# Supplementary material for: Undetectable circulating tumor DNA (ctDNA) levels correlate with favorable outcome in metastatic melanoma patients treated with anti-PD1 therapy
Source: PubMed Central journal article supplement (PMC6727487; doi:10.1186/s12967-019-2051-8), 2019-09-05

# Additional file 1: Figure S1.

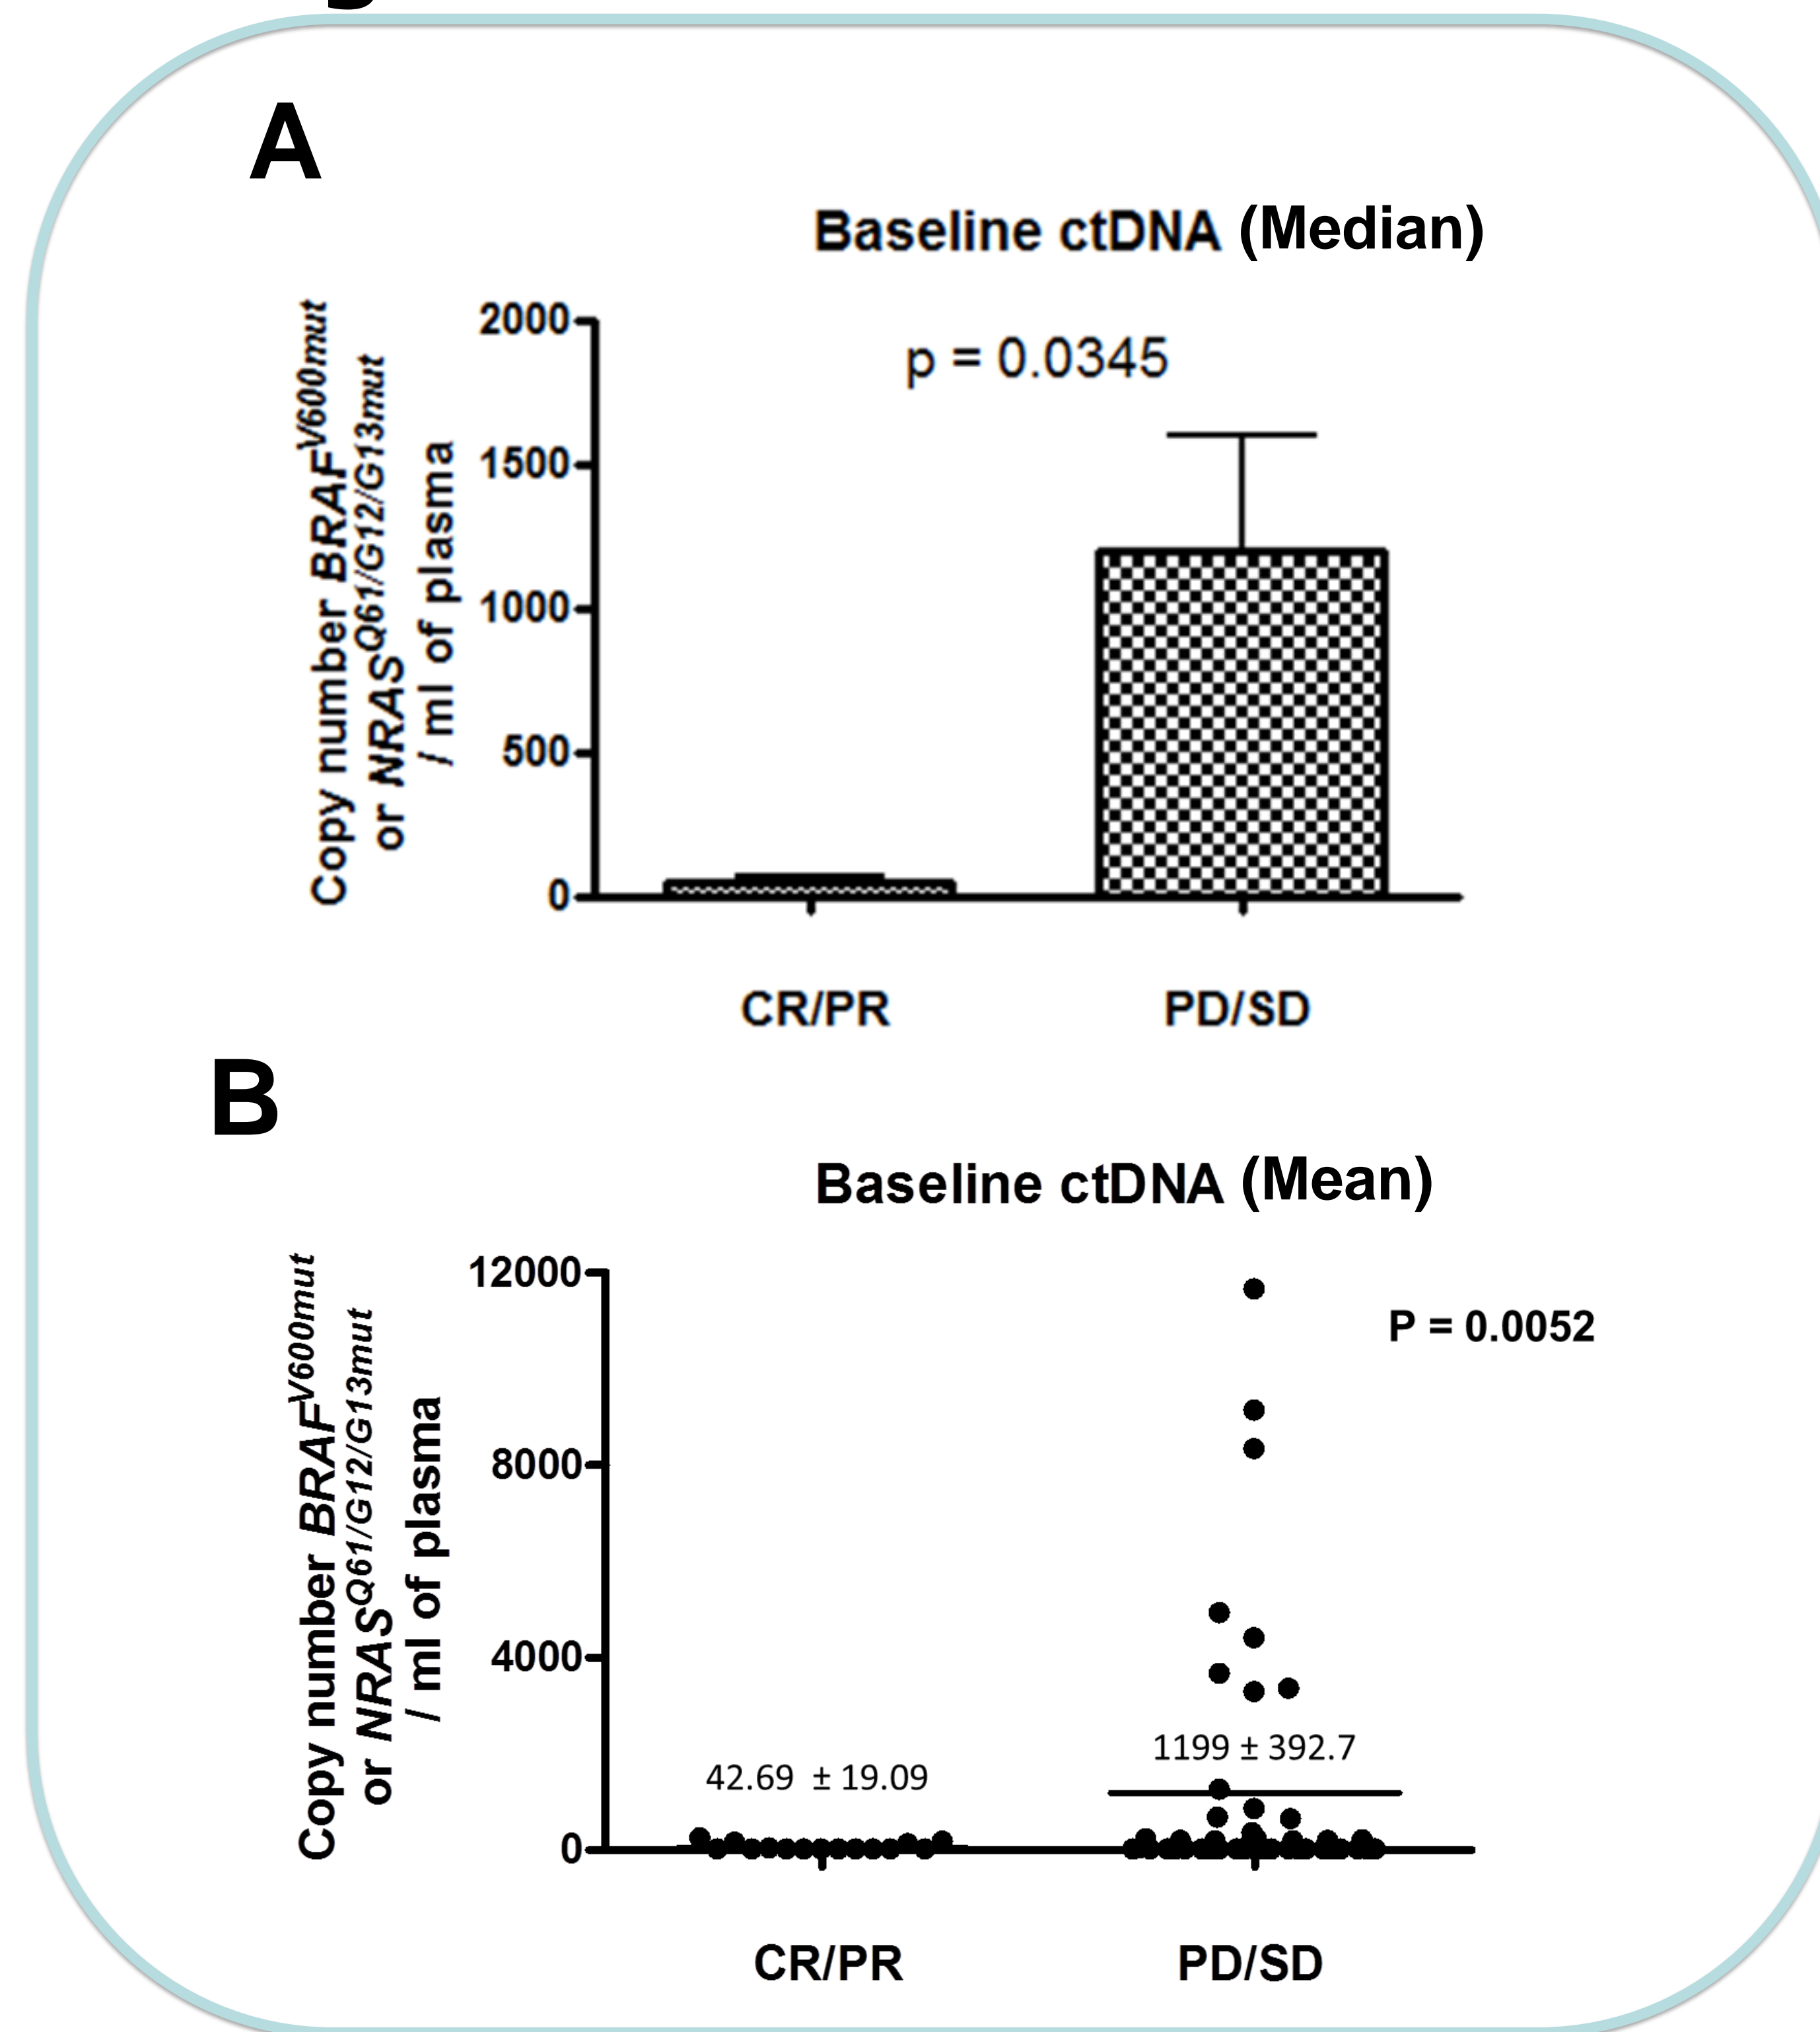

Supplement: 12967_2019_2051_MOESM1_ESM.pdf [file 12967_2019_2051_MOESM1_ESM.pdf]
