# Supplementary material for: Undetectable circulating tumor DNA (ctDNA) levels correlate with favorable outcome in metastatic melanoma patients treated with anti-PD1 therapy
Source: PubMed Central journal article supplement (PMC6727487; doi:10.1186/s12967-019-2051-8), 2019-09-05

# Additional file 4: Figure S3

## A. Subgroup of 10 patients with PD exclusively in CNS

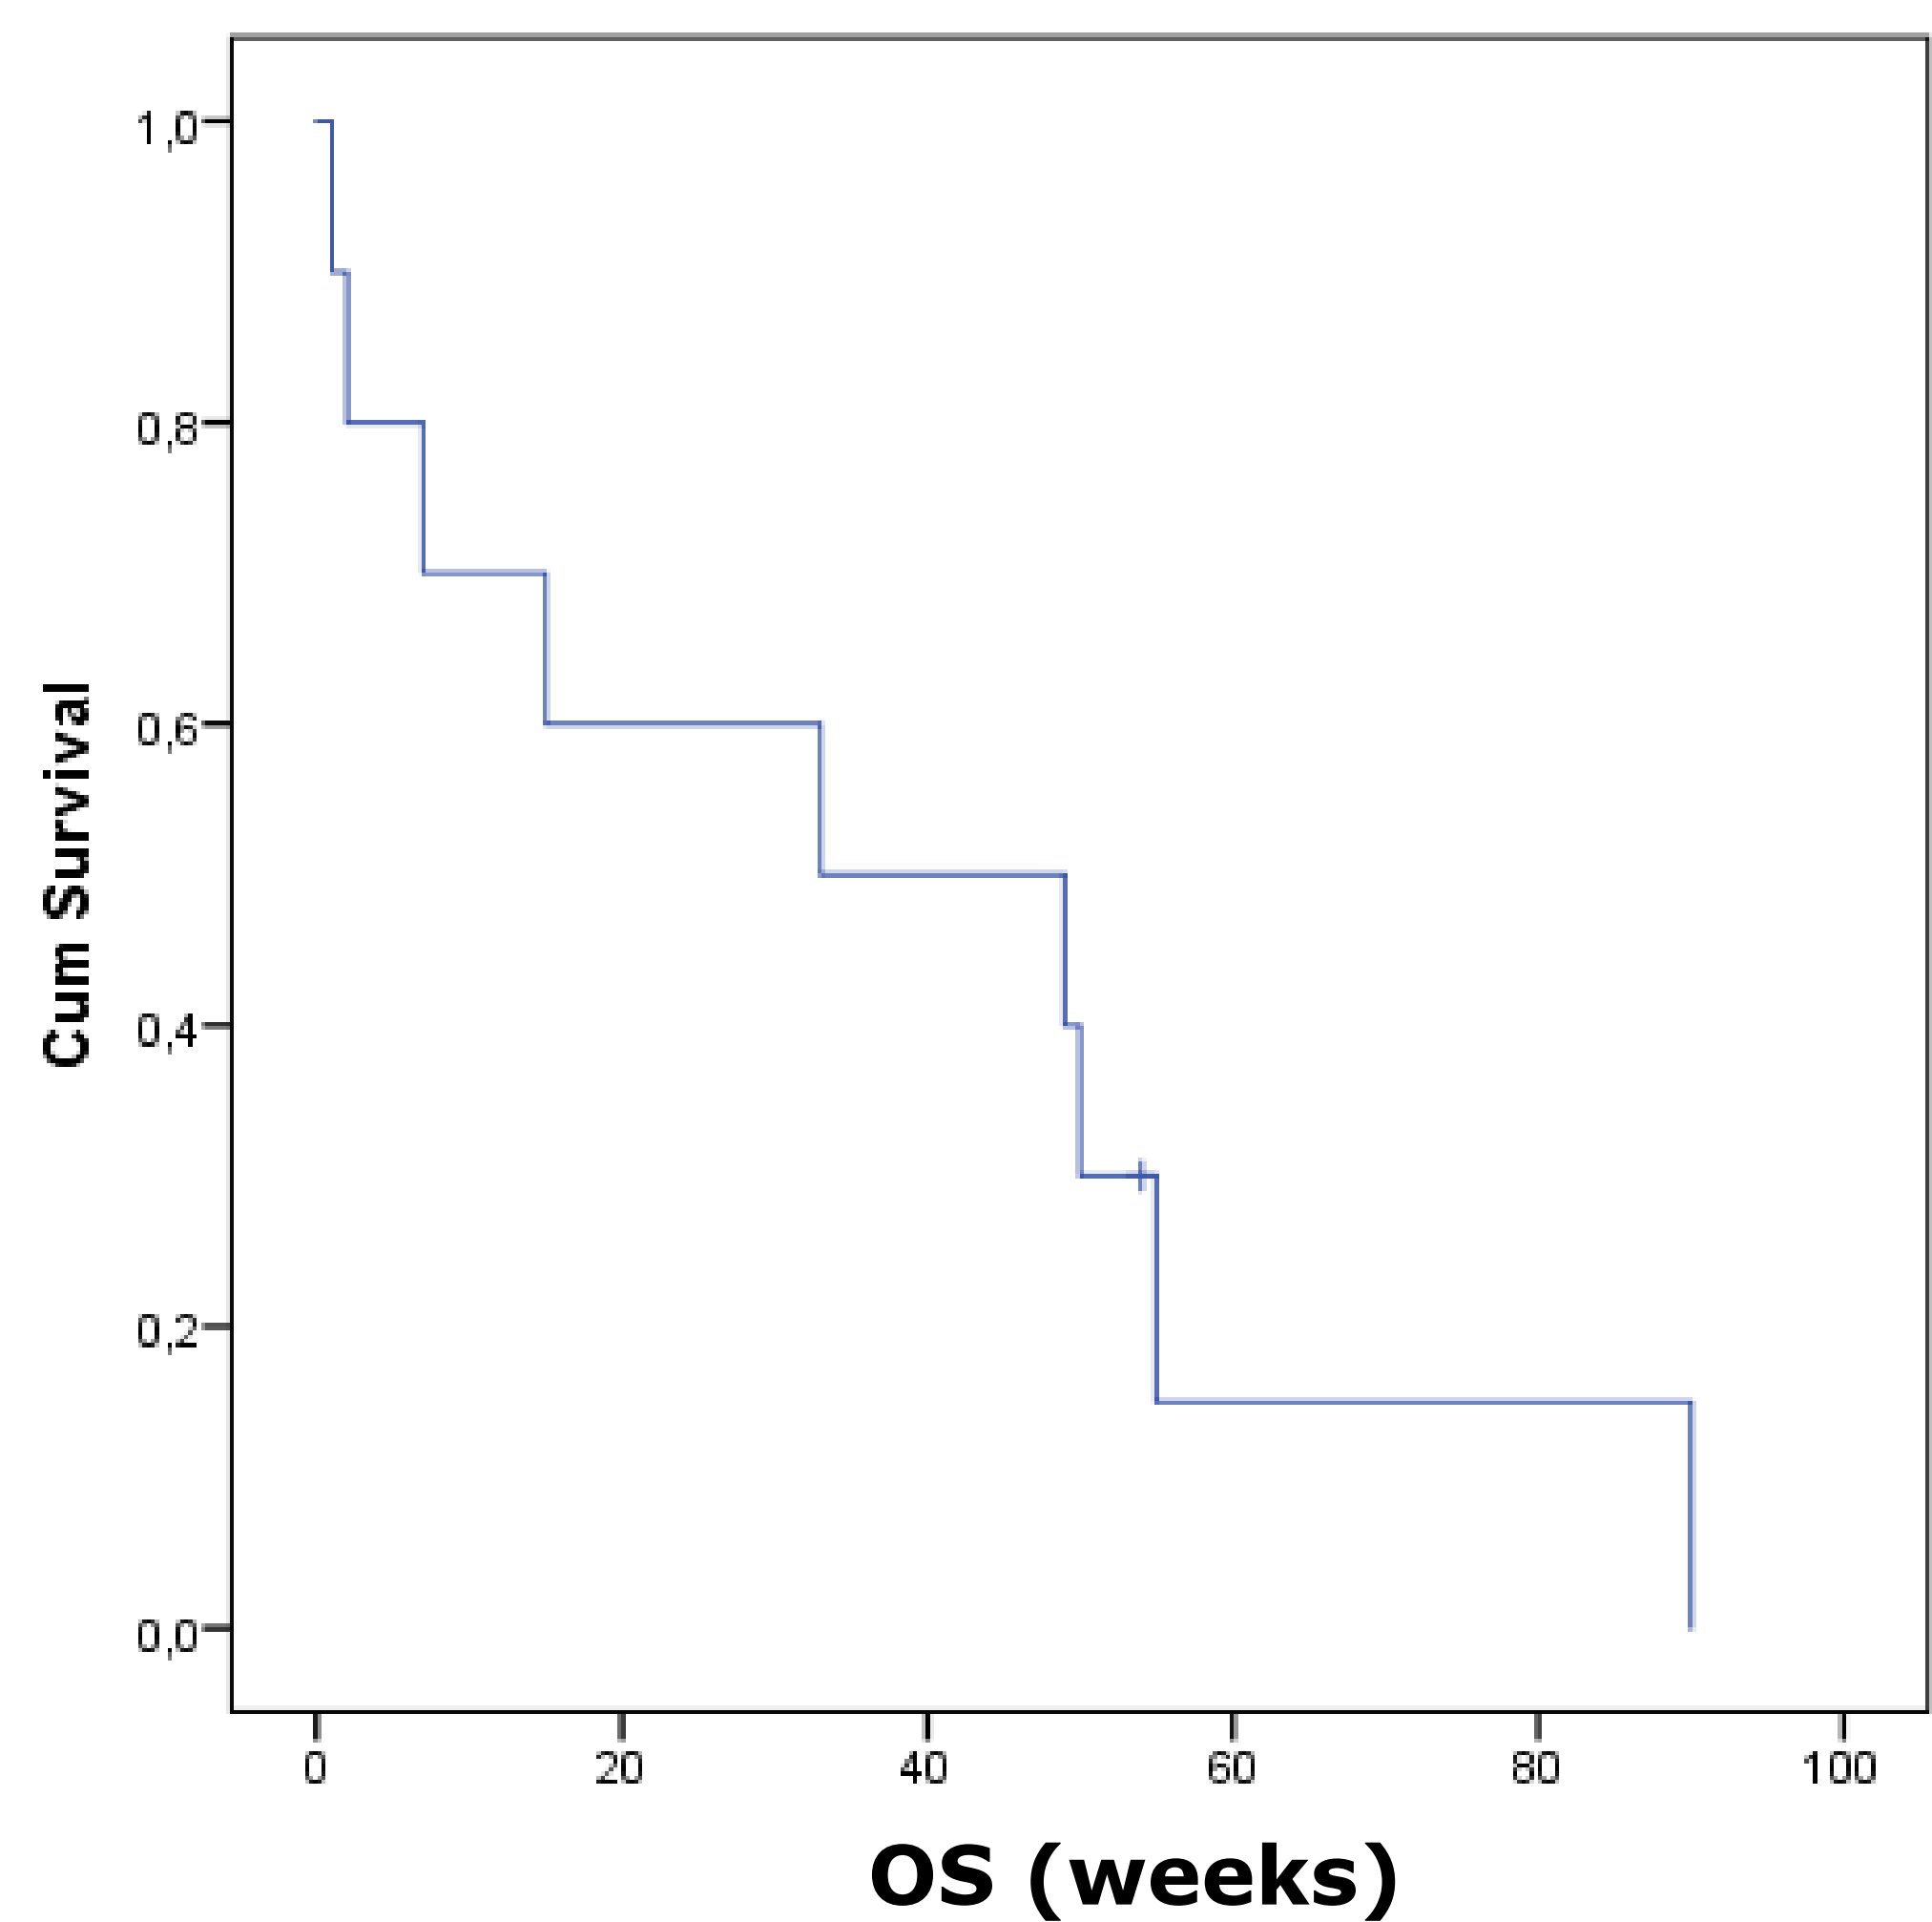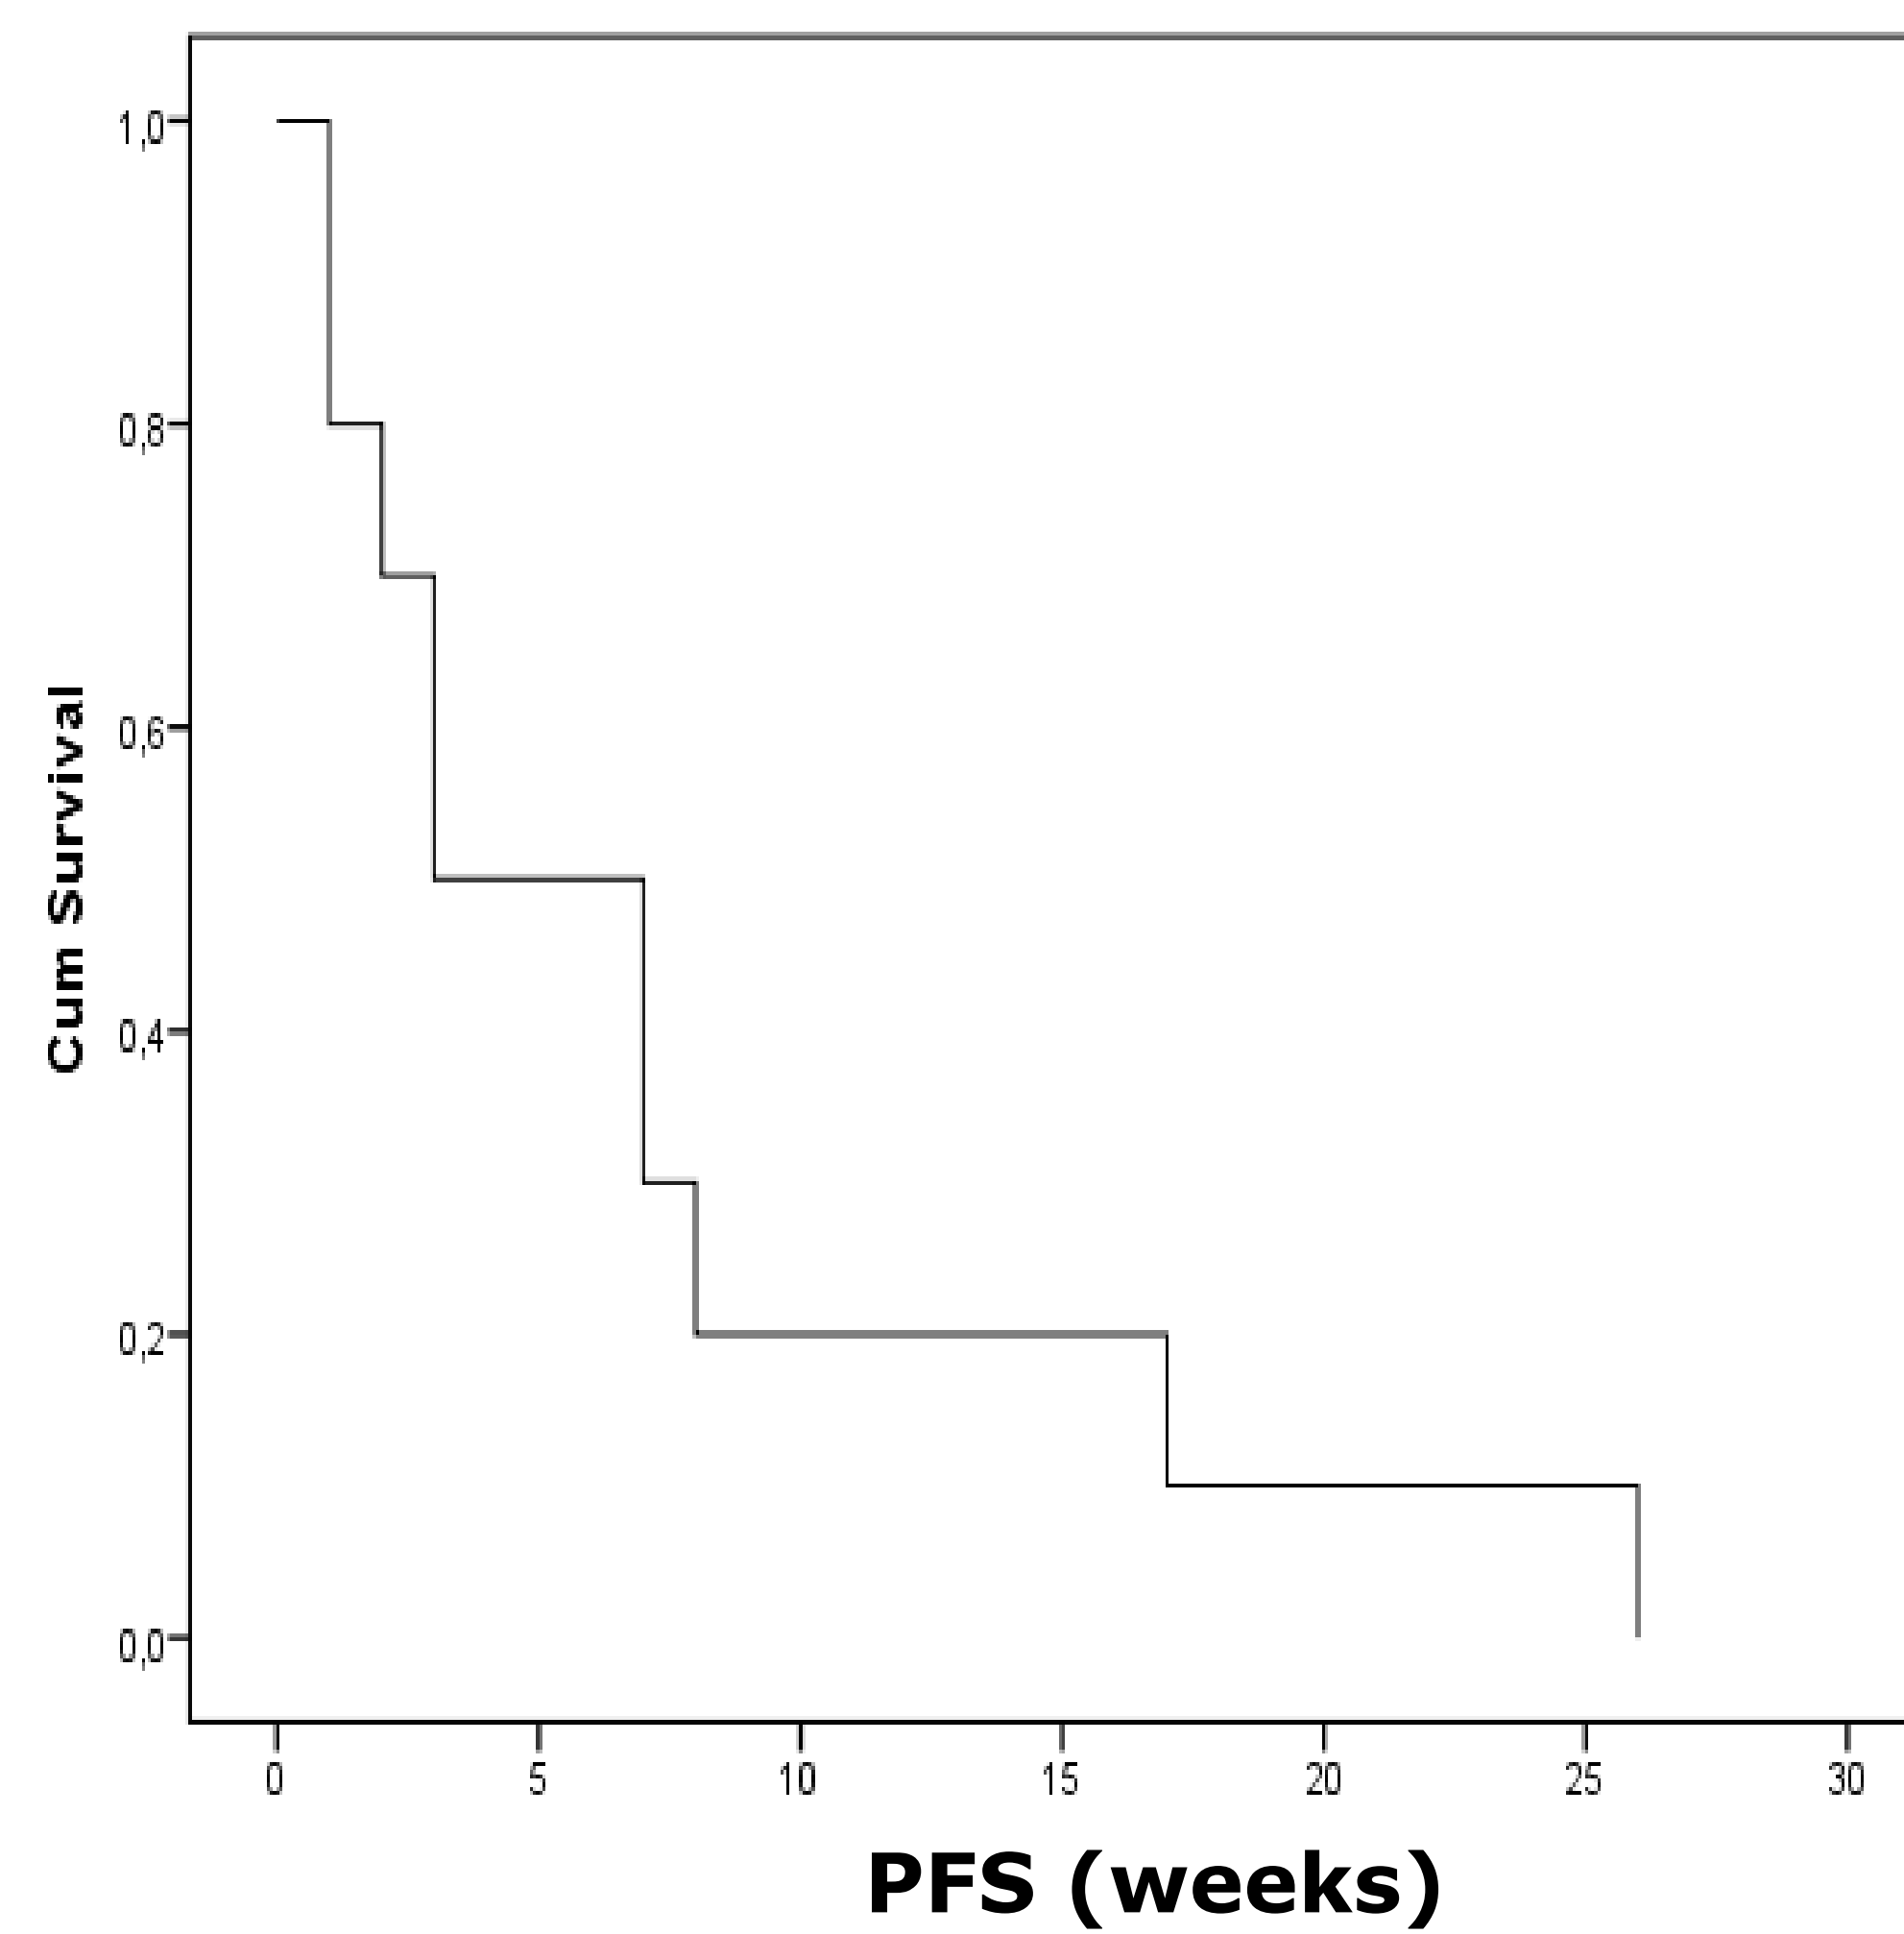

## B. Patient MEL36 monitoring by plasma ctDNA and representative radiological evaluation of the disease course

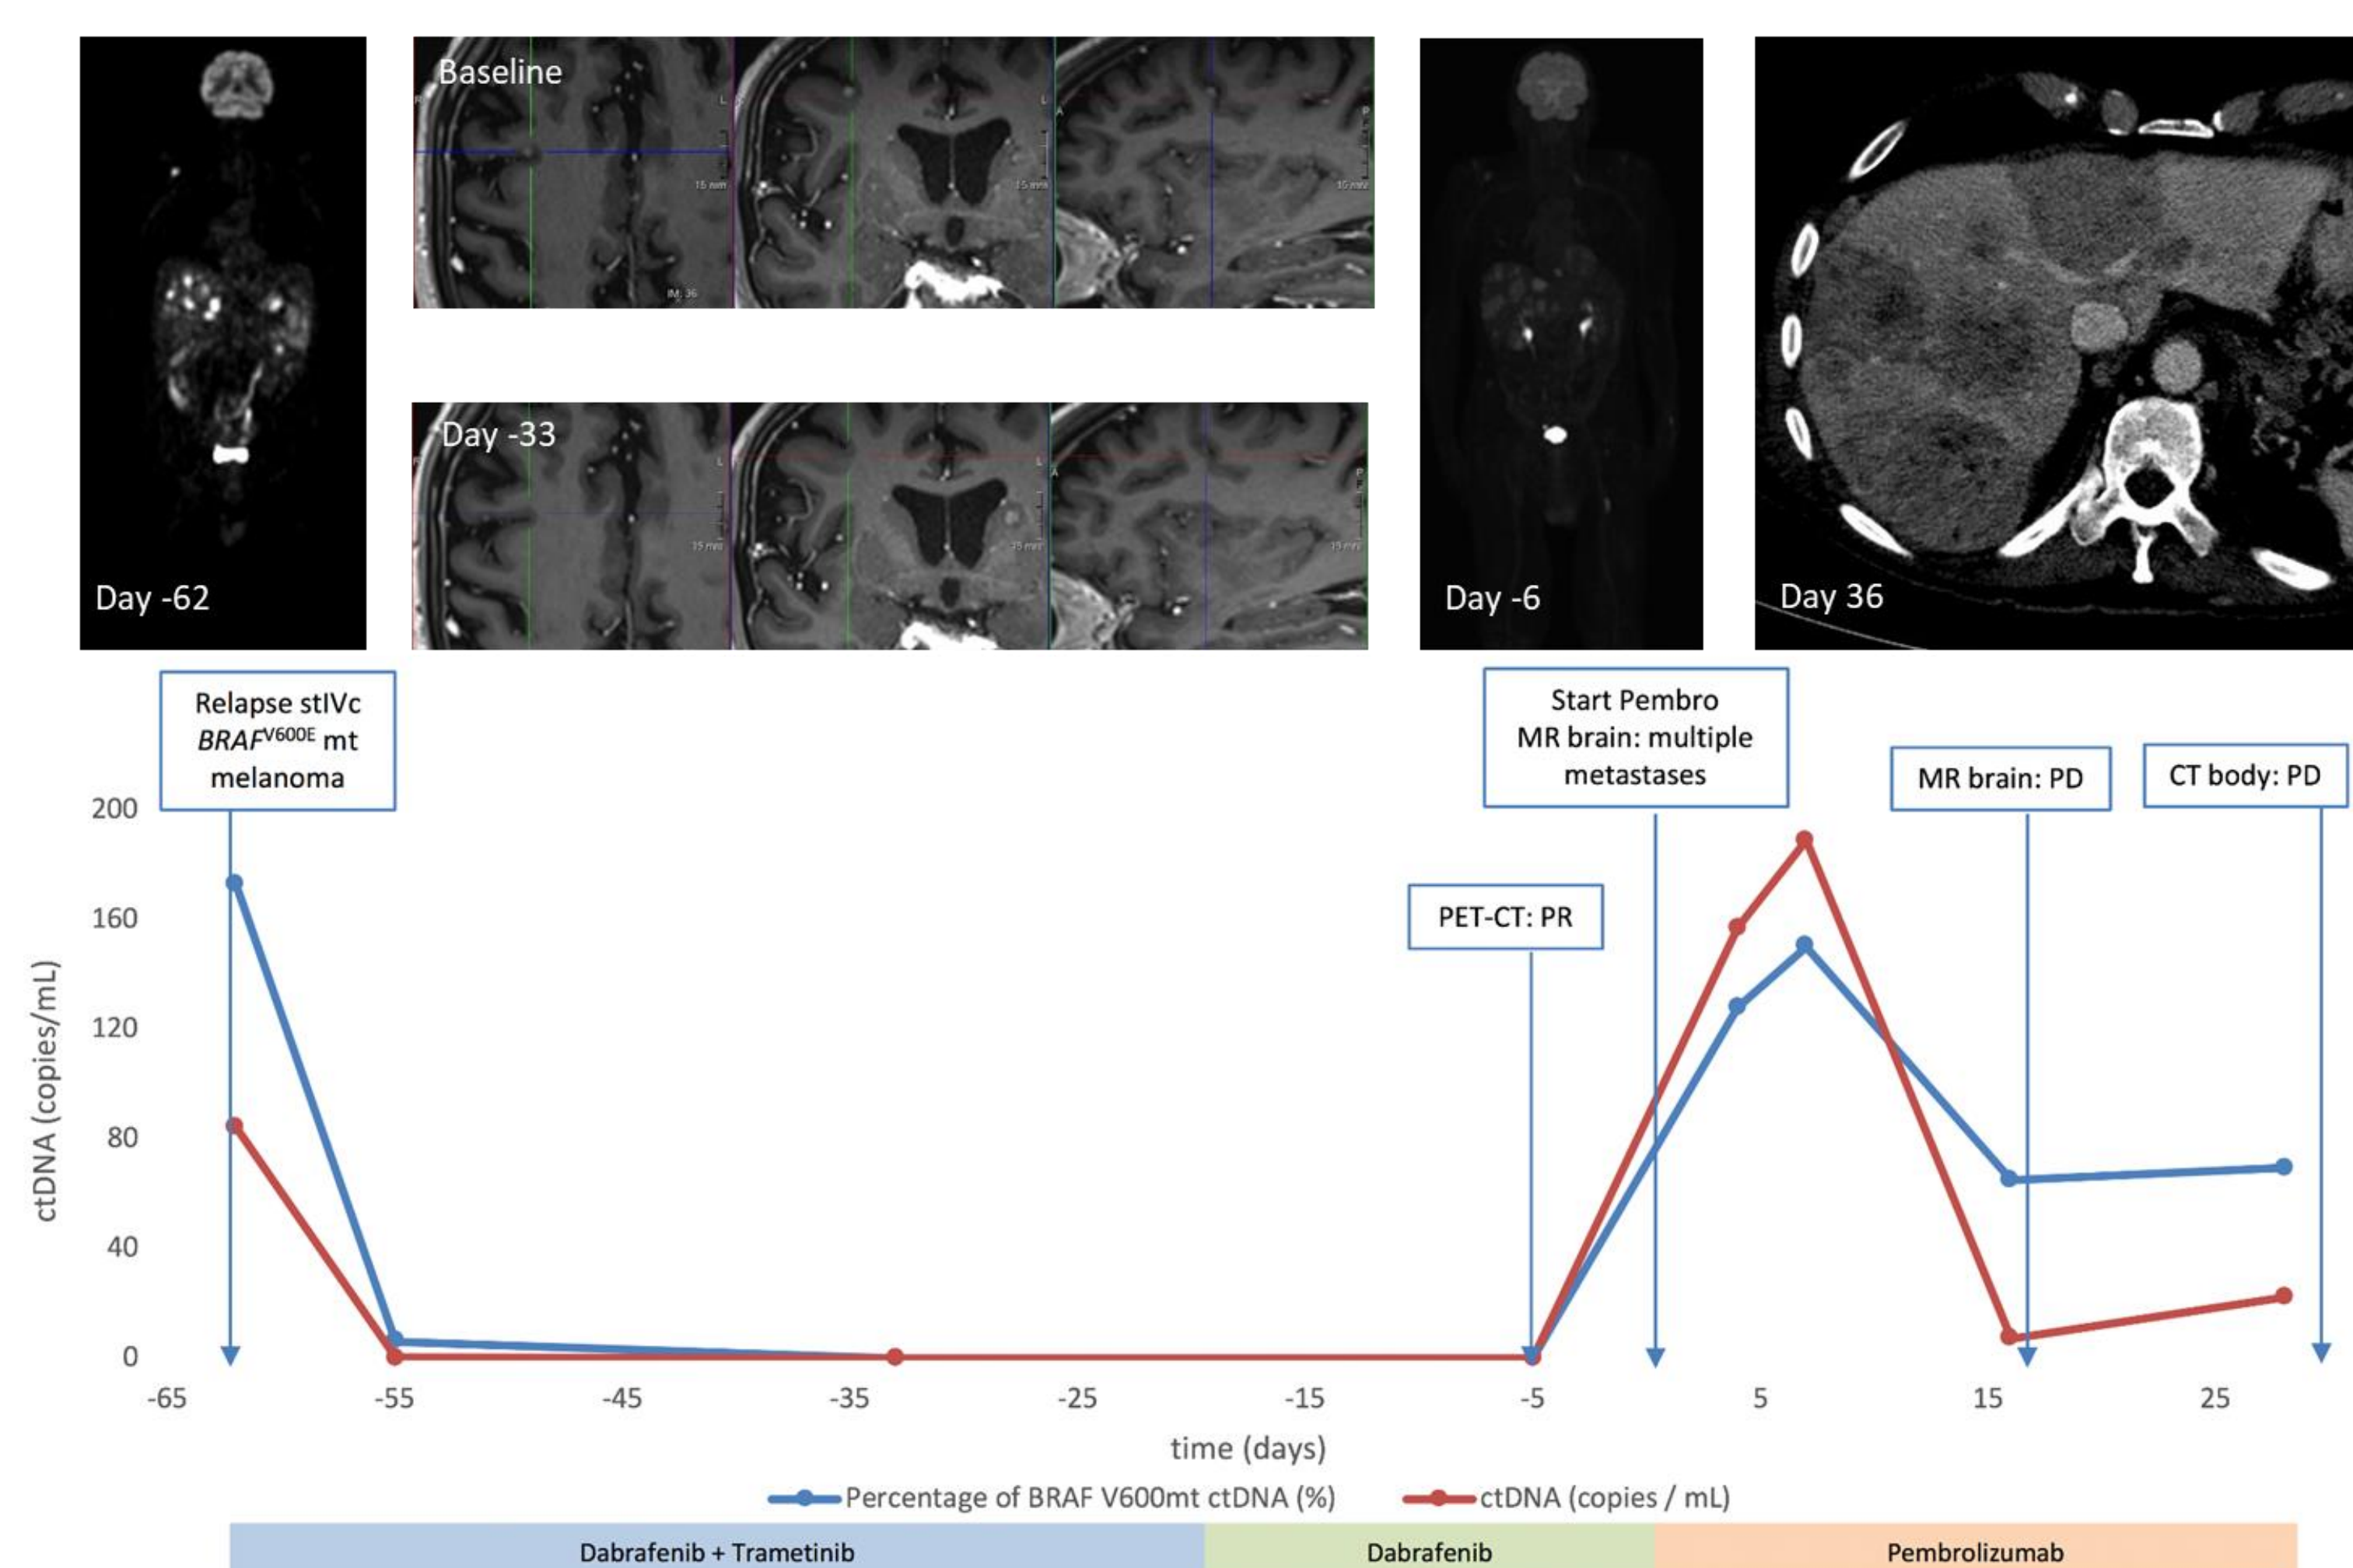

## C. Subgroup of 11 patients with baseline ctDNA > 500 copies/ml of plasma

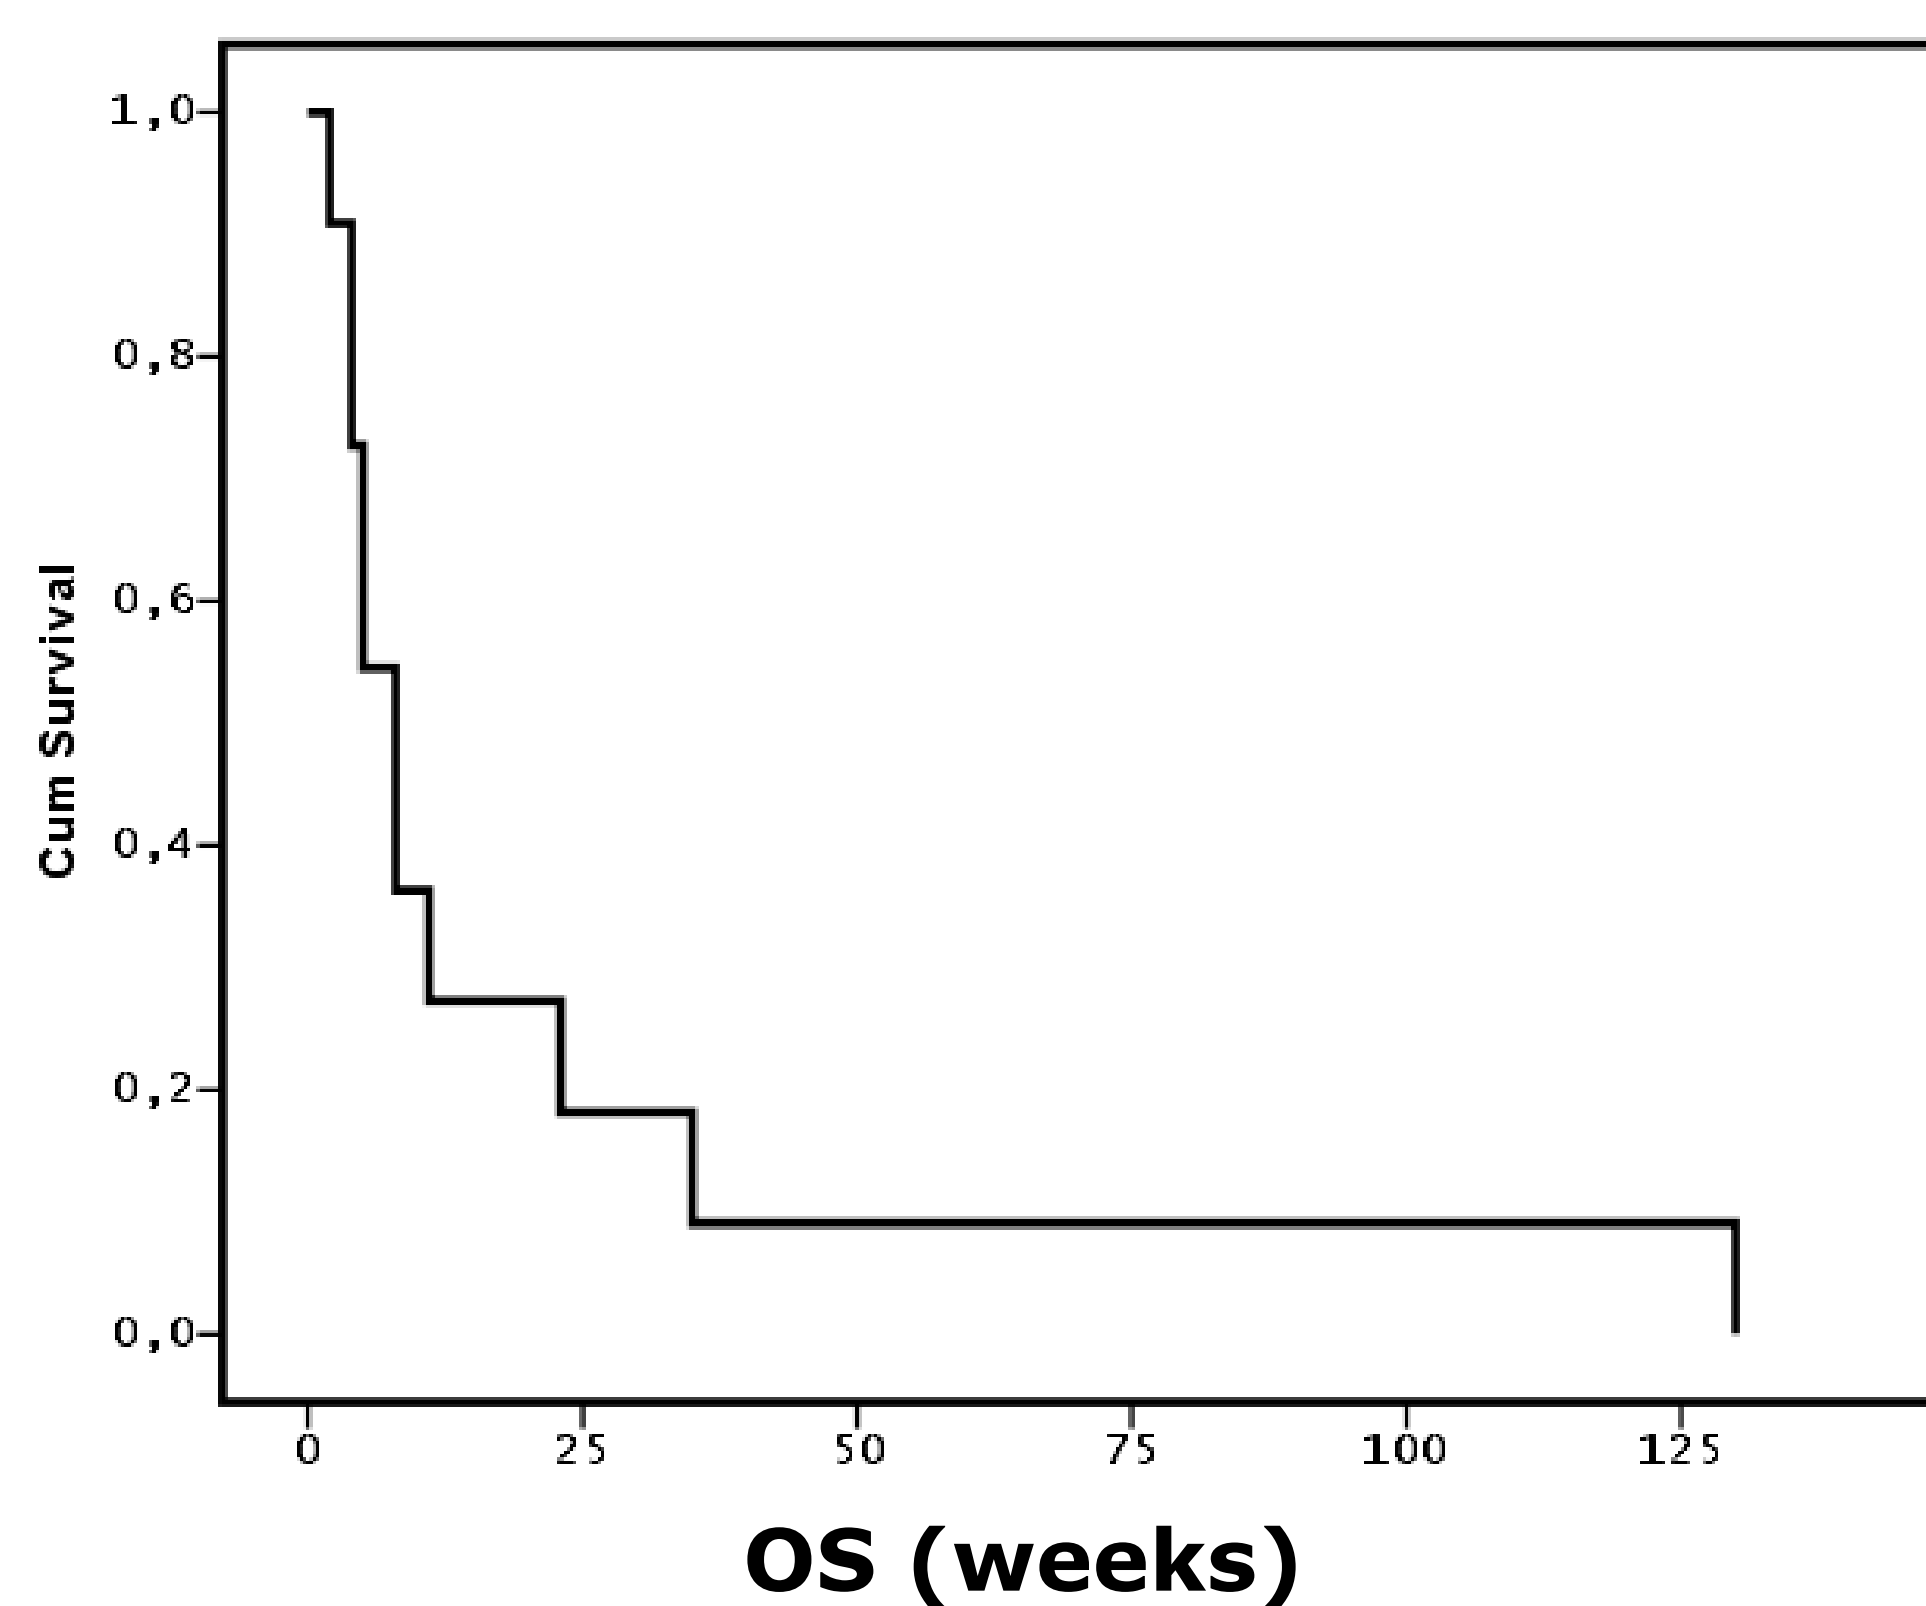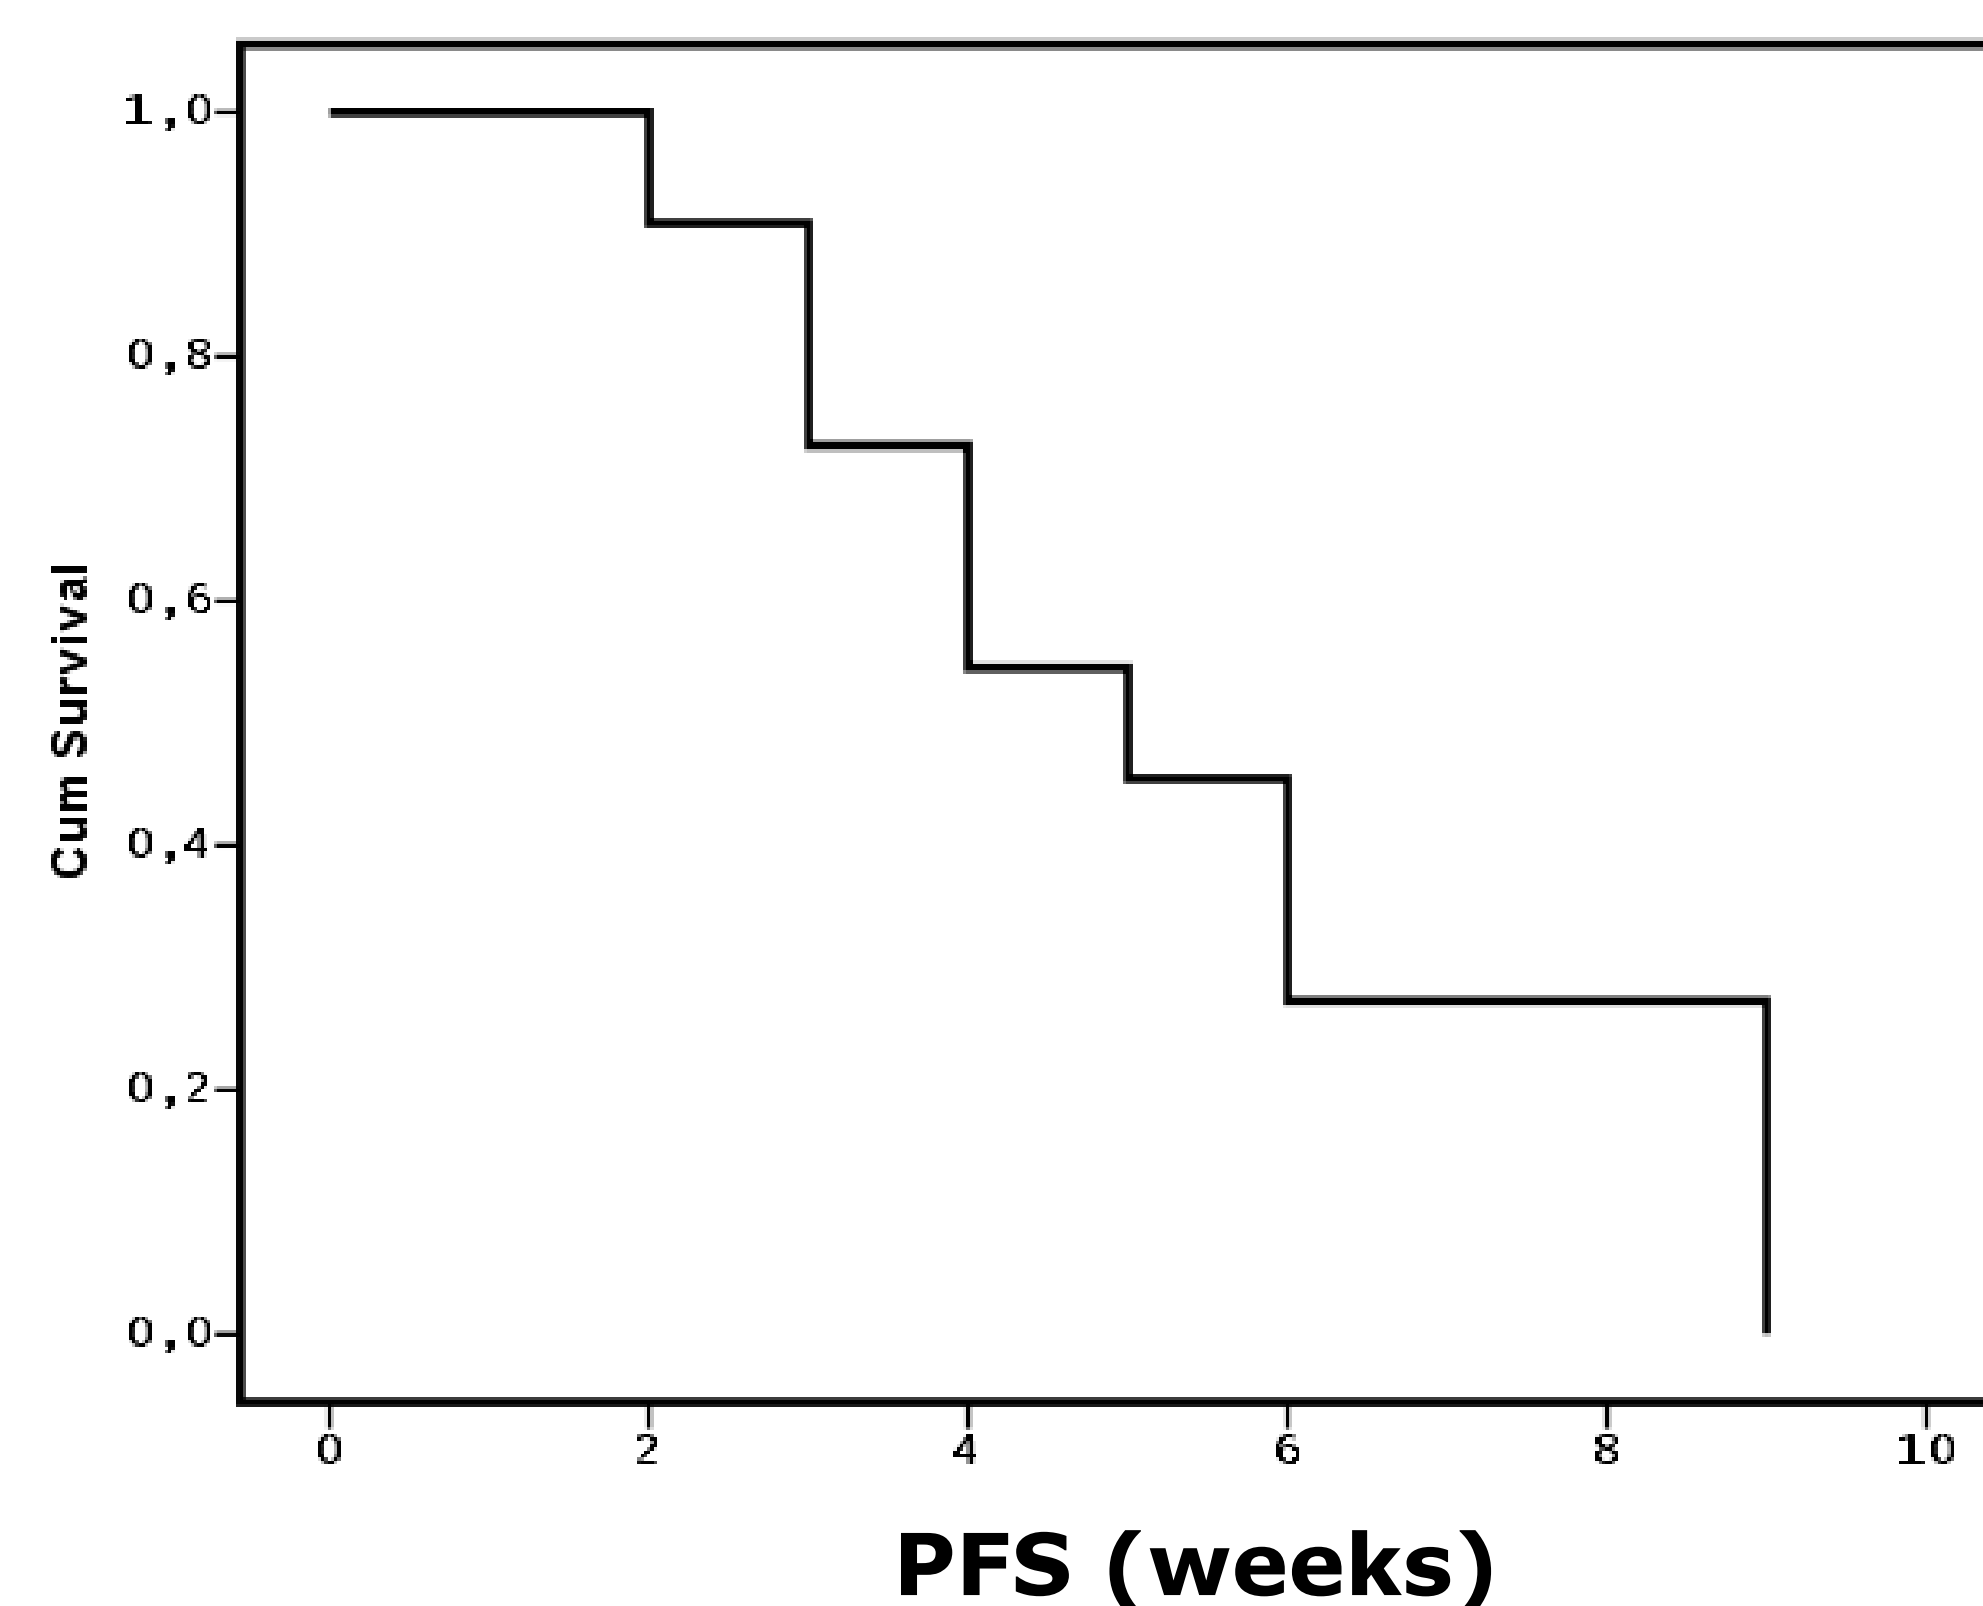

## D. Subgroup of 8 patients with w3 ctDNA > 500 copies/ml of plasma

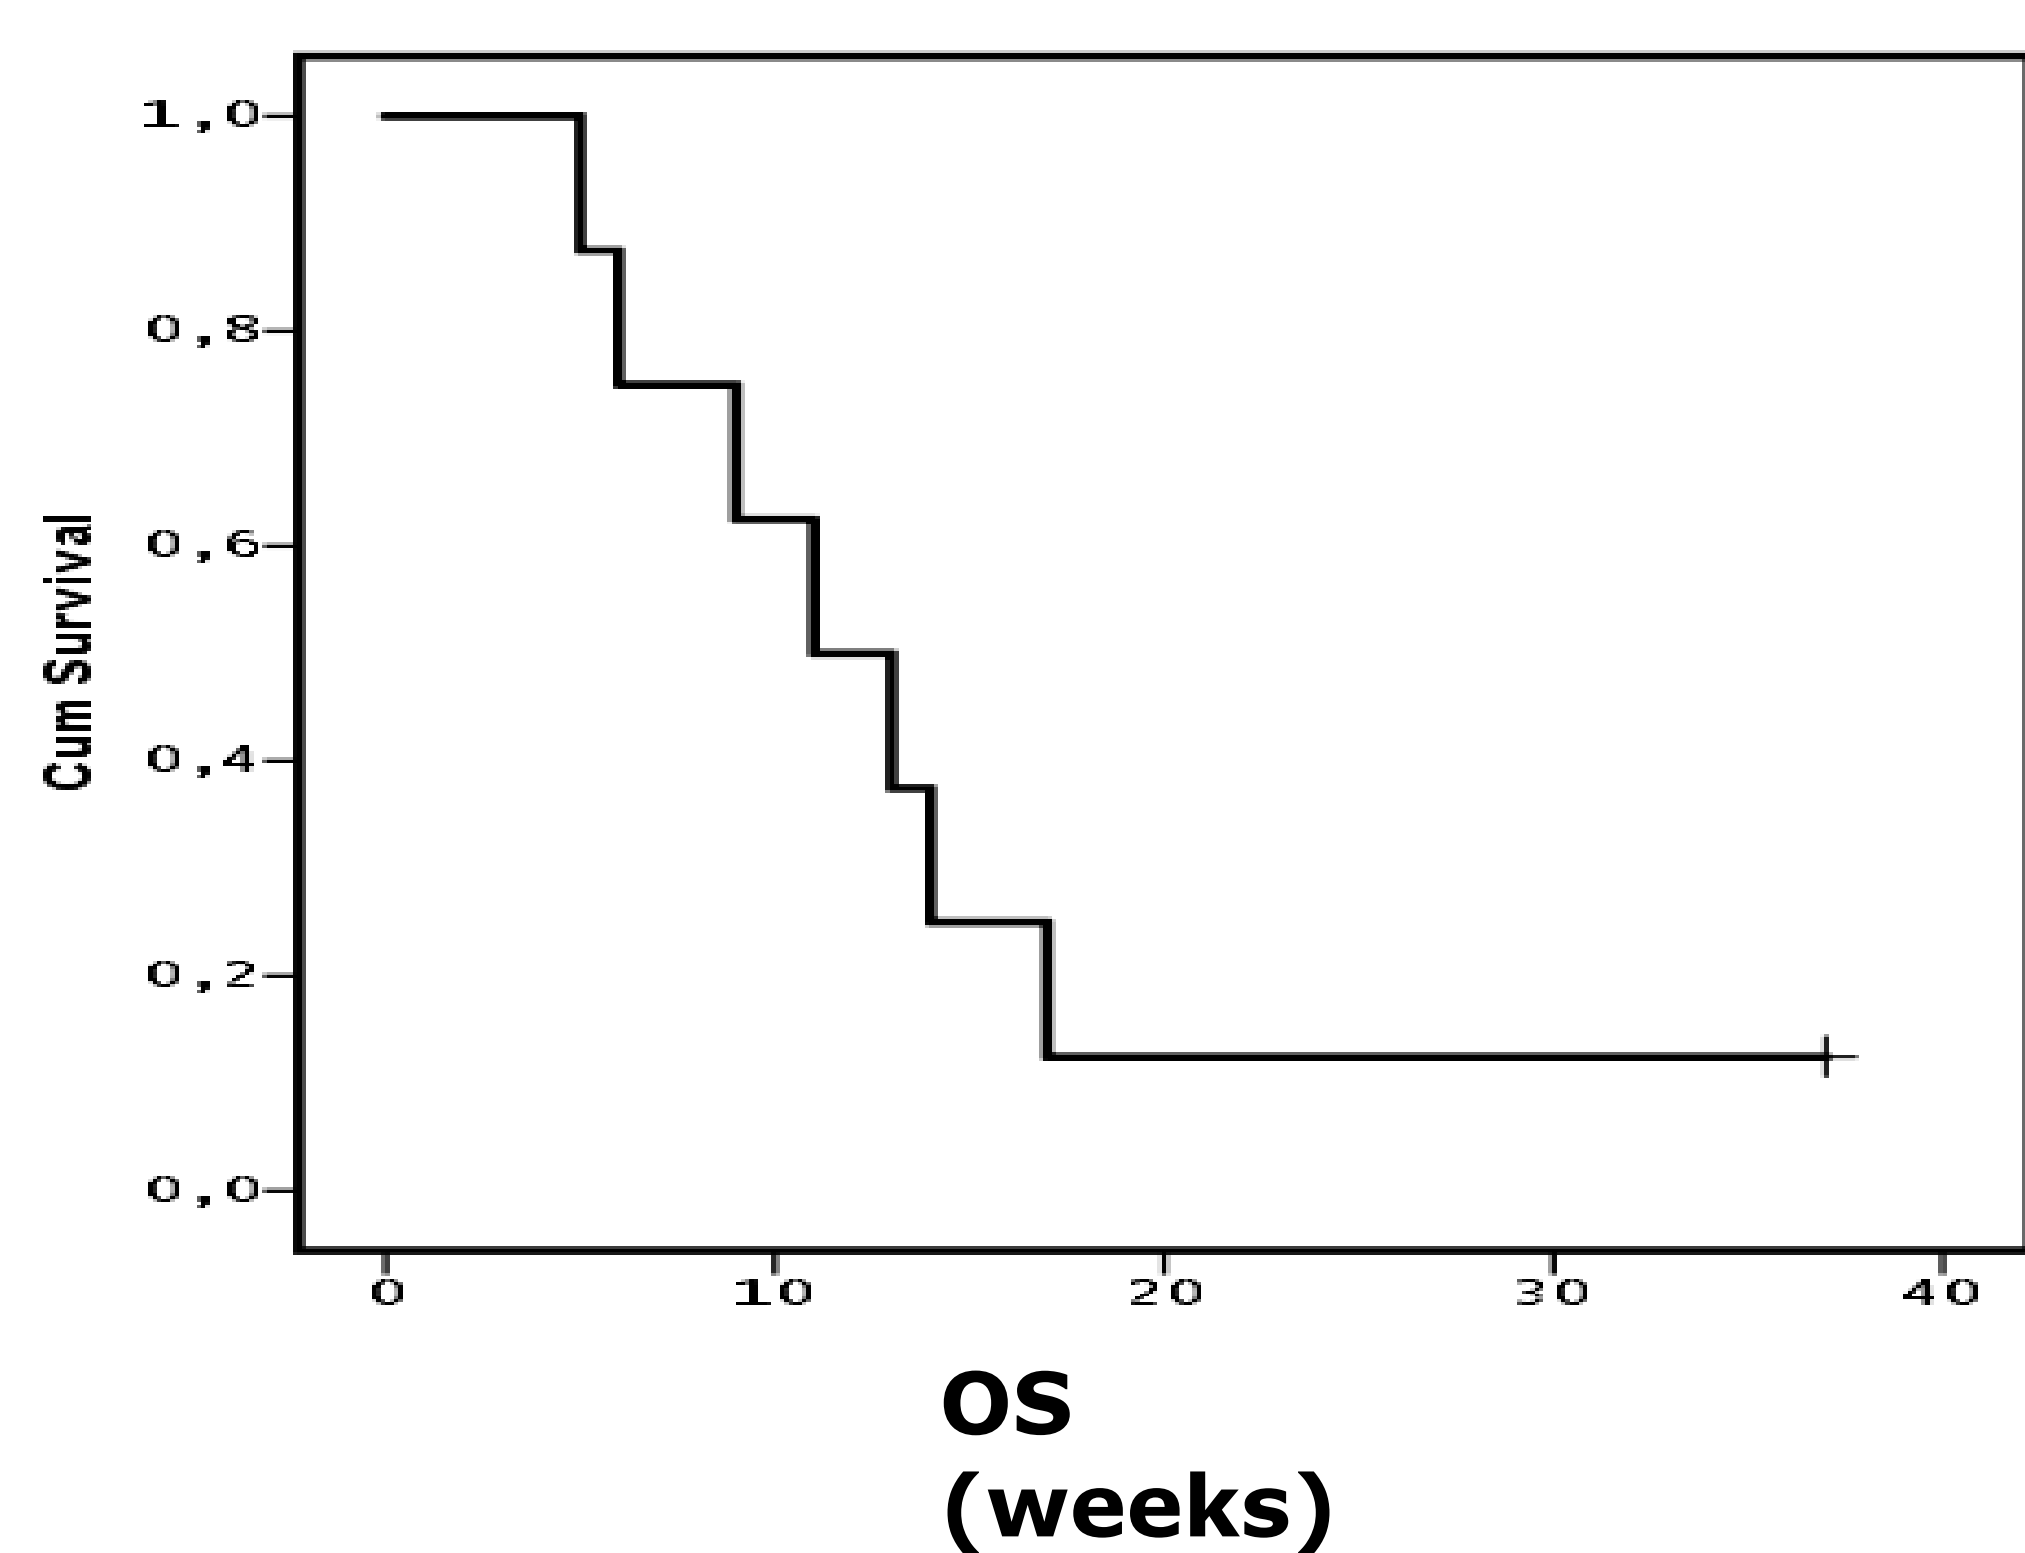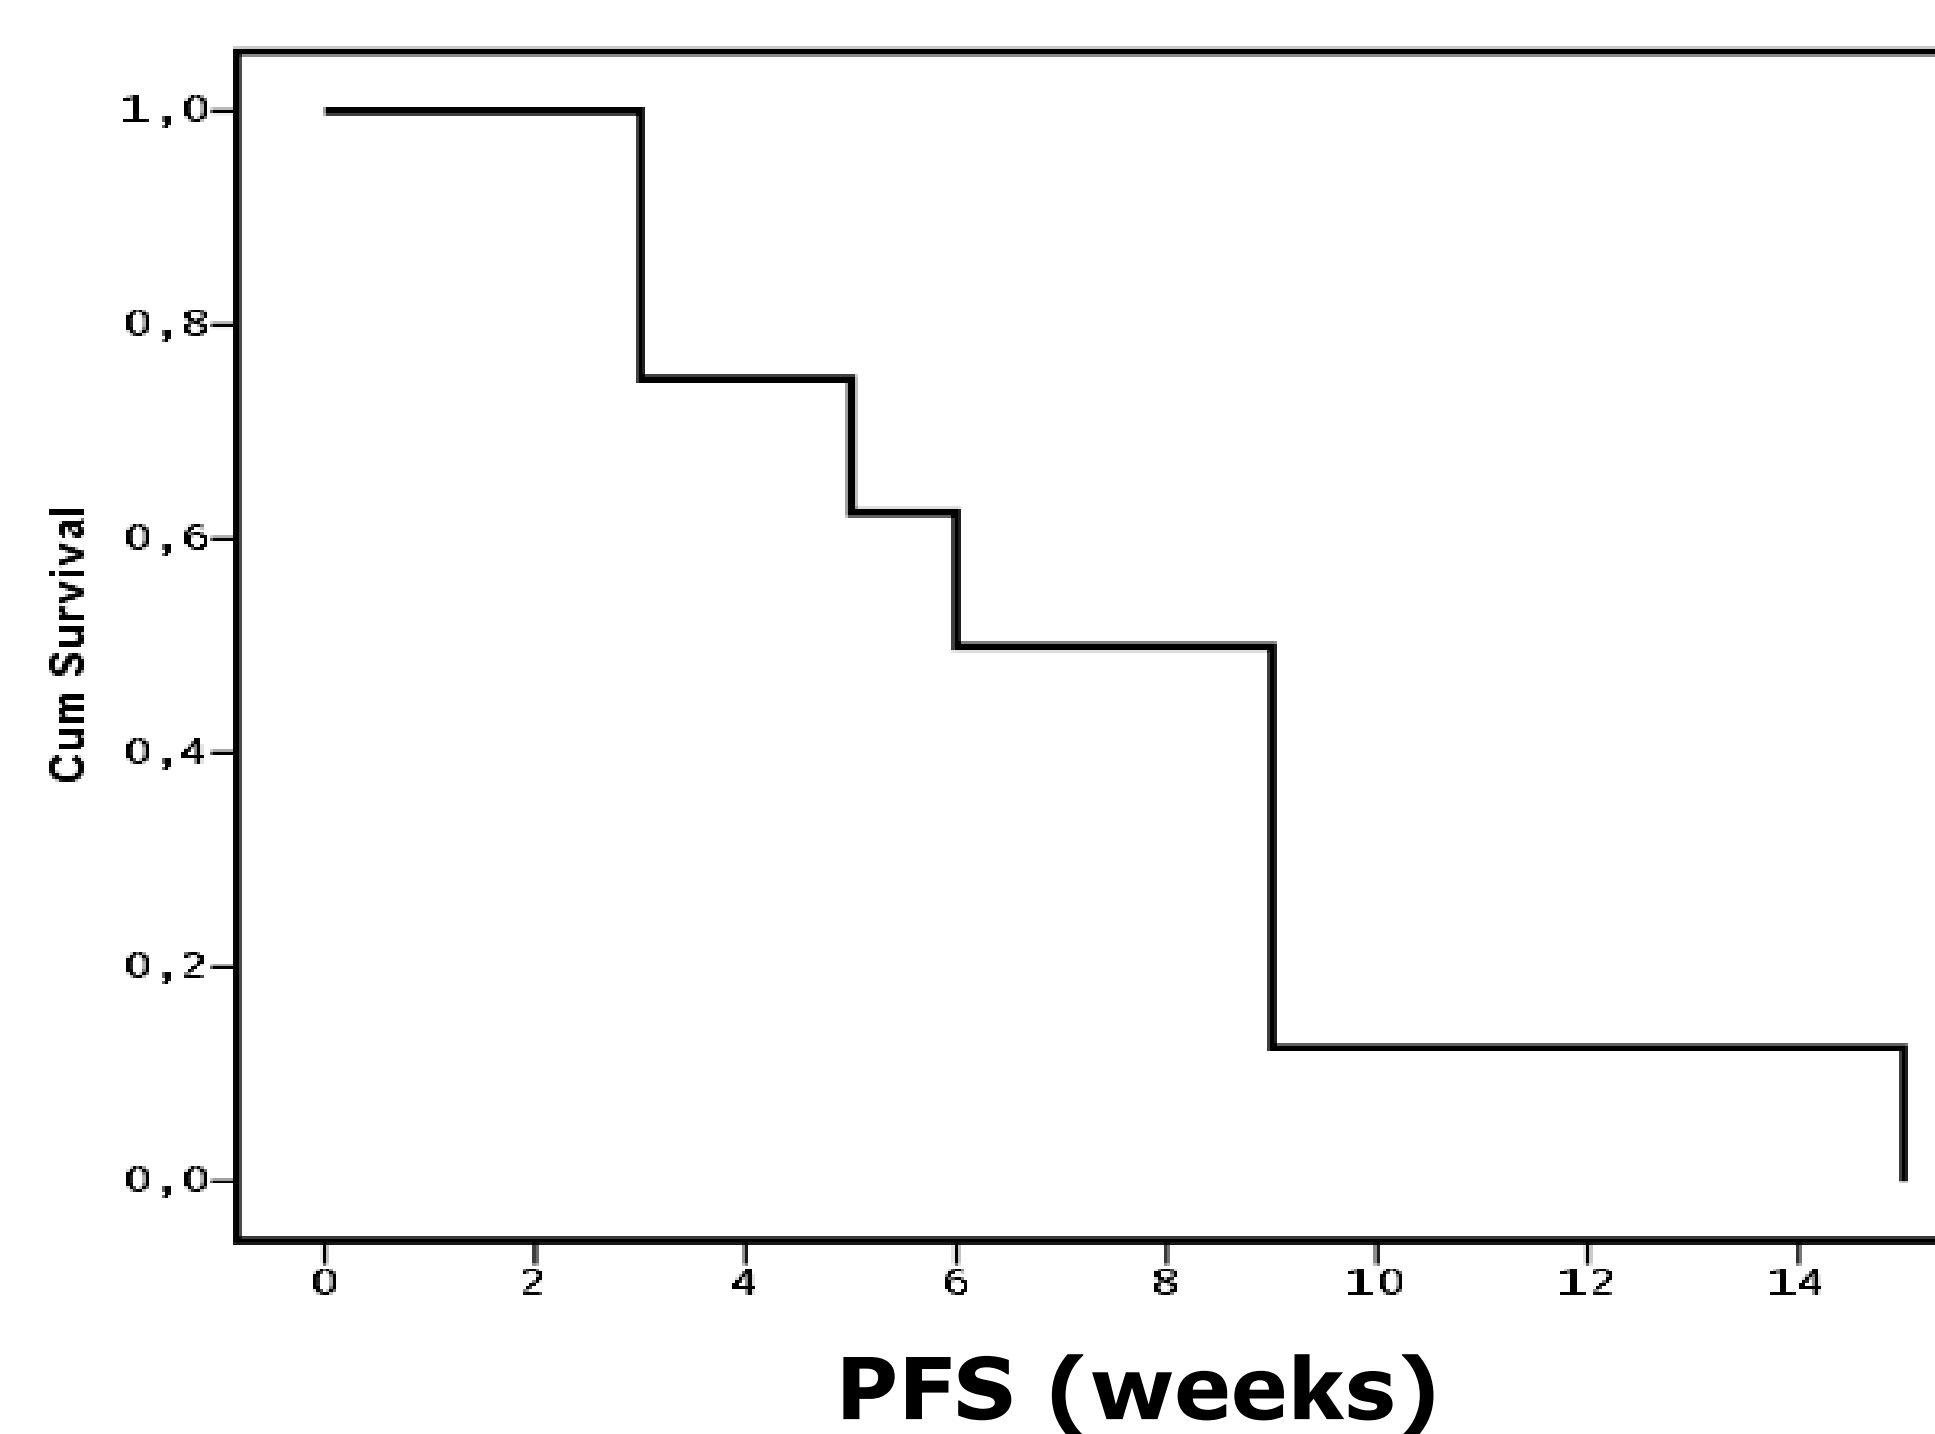

Supplement: 12967_2019_2051_MOESM4_ESM.pdf [file 12967_2019_2051_MOESM4_ESM.pdf]
